# Supplementary material for: High Capacity and High Efficiency Maple Tree-Biomass-Derived Hard Carbon as an Anode Material for Sodium-Ion Batteries
Source: MDPI journal article supplement (doi:10.3390/ma11081294), 2018-07-26

Supplementary Materials to:

# High Capacity and High Efficiency Maple Tree-Biomass-Derived Hard Carbon as an Anode Material for Sodium-ion Batteries

Yuesheng Wang, Zimin Feng, Wen Zhu, Vincent Gariépy, Catherine Gagnon, Manon Provencher, Dharminder Laul, René Veillette, Michel L. Trudeau, Abdelbast Guerfi and Karim Zaghib \*

Center of Excellence in Transportation Electrification and Energy Storage, Hydro-Québec, 1806 boulevard Lionel-boulet, Varennes, QC. J3X1S1, Canada; Wang.Yuesheng@ireq.ca (Y.W.); Feng.Zimin@ireq.ca (Z.F.); Zhu.Wen@ireq.ca (W.Z.); Gariépy.Vincent@ireq.ca (V.G.); Gagnon.Catherine3@ireq.ca (C.G.); Provencher.Manon@ireq.ca (M.P.); Laul.Dharminder@ireq.ca (D.L.); Veillette.Rene2@ireq.ca (R.V.); Trudeau.Michel@ireq.ca (M.L.T.); Guerfi.Abelbast@ireq.ca (A.G.)

\* Correspondence: Zaghib.Karim@ireq.ca

## Supplementary Tables

Supplementary Table S1 | BET parameters. **BET surface area** for HC-1000, HC-1200, HC-1400.

| Sample                                                 | Surface Area (m <sup>2</sup> /g)<br>QuadraSorb (Quantachrome Instruments) |
|--------------------------------------------------------|---------------------------------------------------------------------------|
| HC-1000°C                                              | 72.7                                                                      |
| HC-1200°C                                              | 5.5                                                                       |
| HC-1400°C                                              | 6.4                                                                       |
| Standard<br>Surface area: 98.17±7.53 m <sup>2</sup> /g | 97.5                                                                      |

## Supplementary Figures

Supplementary Figure S1 | SEM images of HC obtained at different temperatures (a) HC-1000, (b) HC-1200 and (c) HC-1400 observed by SEM (scale bar: 50 μm).

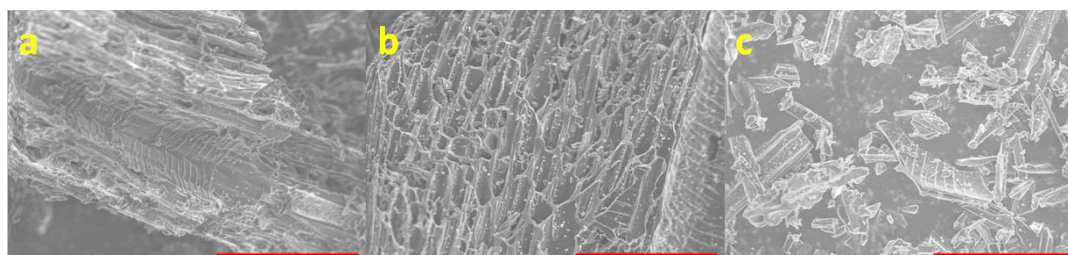

Supplement: s1 [file s1]
